# Supplementary material for: The cost-effectiveness of bevacizumab, ranibizumab and aflibercept for the treatment of age-related macular degeneration—A cost-effectiveness analysis from a societal perspective
Source: PubMed Central journal article supplement (PMC5957378; doi:10.1371/journal.pone.0197670), 2018-05-17
Supplement: pone.0197670.s002.pdf [file pone.0197670.s002.pdf]

**S2 Table. Randomized controlled trials used to estimate treatment effect**

| Study                   | Drug                | Regimen   | Number of patients | Mean number of injections | VA at baseline (ETDRS letters) mean ( $\pm$ SD) | Change in VA after 1 year (ETDRS letters) mean ( $\pm$ SD) | Reference |
|-------------------------|---------------------|-----------|--------------------|---------------------------|-------------------------------------------------|------------------------------------------------------------|-----------|
| <b>CATT 2012</b>        | Ranibizumab 0.5 mg  | PRN       | 285                | 6.9                       | 61.5 (13.2)                                     | 6.8 (13.1)                                                 | [10]      |
| <b>Subramanian 2010</b> | Ranibizumab 0.5 mg  | PRN       | 7                  | 4.0                       | 32.7 (20.9)                                     | 6.3 (13.7)                                                 | [11]      |
| <b>Krebs 2013</b>       | Ranibizumab 0.5 mg  | PRN       | 263                | 5.8                       | 56.4 (13.5)                                     | 4.1 (7.0)                                                  | [12]      |
| <b>Kodjikian 2013</b>   | Ranibizumab 0.5 mg  | PRN       | 183                | 6.5                       | 55.78 (13.99)                                   | 2.9 (15.1)                                                 | [13]      |
| <b>Busbee 2013</b>      | Ranibizumab 0.5 mg  | PRN       | 275                | 7.7                       | 54.5 (11.7)                                     | 8.2 (13.3)                                                 | [16]      |
| <b>SAILOR 1 2009</b>    | Ranibizumab 0.5 mg  | PRN       | 490                | 4.9                       | 48.9 (13.8)                                     | 2.3 (22.1)                                                 | [17]      |
| <hr/>                   |                     |           |                    |                           |                                                 |                                                            |           |
| <b>CATT 2012</b>        | Bevacizumab 1.25 mg | PRN       | 271                | 7.7                       | 60.4 (13.4)                                     | 5.9 (15.7)                                                 | [10]      |
| <b>Subramanian 2010</b> | Bevacizumab 1.25 mg | PRN       | 15                 | 8.0                       | 34.93 (14.58)                                   | 7.6 (15.3)                                                 | [11]      |
| <b>Krebs 2013</b>       | Bevacizumab 1.25 mg | PRN       | 154                | 6.1                       | 57.0 (13.0)                                     | 4.9 (7.0)                                                  | [12]      |
| <b>Kodjikian 2013</b>   | Bevacizumab 1.25 mg | PRN       | 191                | 6.8                       | 54.62 (14.07)                                   | 4.8 (14.9)                                                 | [13]      |
| <hr/>                   |                     |           |                    |                           |                                                 |                                                            |           |
| <b>VIEW 1 2012</b>      | Aflibercept 2 mg    | Bimonthly | 301                | 7                         | 55.7 (12.8)                                     | 7.9 (15.0)                                                 | [9]       |
| <b>VIEW 2 2012</b>      | Aflibercept 2 mg    | Bimonthly | 306                | 7                         | 51.6 (13.9)                                     | 8.9 (14.4)                                                 | [9]       |

PRN = pro re nata, injections are administered on an as-needed basis depending on disease activity;

VA = visual acuity; ETDRS = early treatment for diabetic retinopathy study; SD = standard deviation
