# Supplementary material for: The cost-effectiveness of bevacizumab, ranibizumab and aflibercept for the treatment of age-related macular degeneration—A cost-effectiveness analysis from a societal perspective
Source: PubMed Central journal article supplement (PMC5957378; doi:10.1371/journal.pone.0197670), 2018-05-17
Supplement: pone.0197670.s003.pdf [file pone.0197670.s003.pdf]

**S3 Table. Direct and indirect costs for neovascular AMD treatment**

|                                        | <b>Unit</b>                                                       | <b>Costs (€)</b>                           | <b>SE</b>                               | <b>Distribution</b> | <b>Source</b>     |
|----------------------------------------|-------------------------------------------------------------------|--------------------------------------------|-----------------------------------------|---------------------|-------------------|
| <b>Aflibercept</b>                     | Per injection<br>Average per year:<br>7.0                         | 943.48                                     |                                         | Fixed               | DNHCI             |
| <b>Ranibizumab</b>                     | Per injection<br>Average per year:<br>6.2                         | 979.14                                     |                                         | Fixed               | DNHCI             |
| <b>Bevacizumab</b>                     | Per injection<br>Average per year:<br>7.0                         | 44.45                                      |                                         | Fixed               | DNHCI             |
| <b>Medical visit</b>                   | Per visit<br>Per year: 12                                         | 140.42                                     |                                         | Fixed               | Radboudumc        |
| <b>Optical coherence tomography</b>    | Per measurement<br>Per year: 12                                   | 33.39                                      | 5.0                                     | Gamma               | Radboudumc        |
| <b>Fluorescein angiography</b>         | Per measurement<br>Per year: 1                                    | 111.33                                     | 10.0                                    | Gamma               | Radboudumc        |
| <b>Visual acuity measurement</b>       | Per measurement<br>Per year: 12                                   | 12.19                                      | 2.0                                     | Gamma               | Radboudumc        |
| <b>Fundus photograph</b>               | Per measurement<br>Per year: 1                                    | 39.0                                       | 10.0                                    | Gamma               | Radboudumc        |
| <b>Low vision aids*</b><br>(One-time)  | If 20/20-20/25<br>If 20/30-20/40<br>If 20/50-20/100<br>If ≤20/200 | 218.24<br>451.69<br>1020.00<br>1065.87     | 85.95<br>74.97<br>53.74<br>73.76        | Gamma               | Low Vision Totaal |
| <b>Nonmedical costs#</b><br>(One-time) | If 20/20-20/25<br>If 20/30-20/40<br>If 20/50-20/100<br>If ≤20/200 | 1141.69<br>6165.32<br>19477.18<br>42318.61 | 327.09<br>1947.80<br>2599.00<br>3822.44 | Gamma               | Brown et al.[20]  |

SE=Standard error; DNHCI=Dutch National Health Care Institute, [www.medicijnkosten.nl](http://www.medicijnkosten.nl), 2014; Radboudumc = Department of Ophthalmology of the Radboudumc.

The medical visit is the same regardless of whether an injection was administered during the visit. Costs for low vision aids and nonmedical costs were determined at the end of the first year based on the final visual acuity.

\*Low vision aids includes (electronic) loupes, loupe glasses, filter glasses, loupe lamp, monitor loupes;

#Nonmedical costs include caregivers costs for inside activities of daily living (ADL), outside ADL and transportation costs and residence costs.
